# Supplementary material for: A new structural form for a decanuclear copper(ii) assembly
Source: Royal Society of Chemistry journal article supplement (doi:10.1039/b510145j), 2005-01-01
Supplement: b510145j.pdf [file b510145j.pdf]

## A new structural form for a decanuclear copper (II) assembly

Vadapalli Chandrasekhar,<sup>\*a</sup> Loganathan Nagarajan,<sup>a</sup> Kandasamy Gopal,<sup>a</sup> Viswanathan Baskar<sup>a</sup> and Paul Kögerler<sup>b</sup>

<sup>a</sup> Department of Chemistry, Indian Institute of Technology-Kanpur, Kanpur-208 016, India. Fax: 91-512-259-0007/7436; Tel: 91-512-259-7259; E-mail: vc@iitk.ac.in

<sup>b</sup> Ames Laboratory, Department of Physics and Astronomy, Iowa State University, Ames, Iowa-50011, U.S.

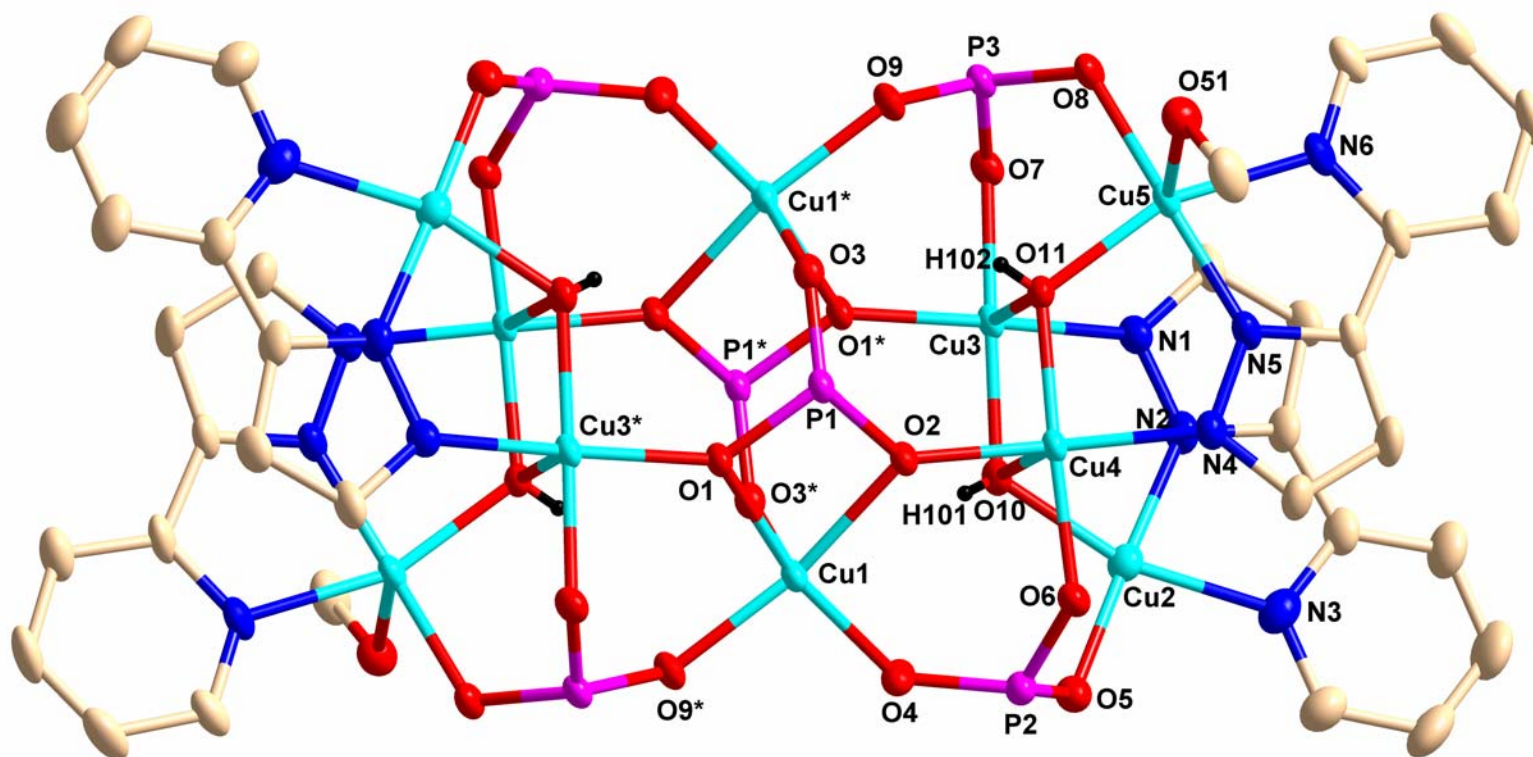

**Figure S1** Structure of the *butterfly* cluster **1** (Colour version of the Fig. 1 in the main text). Structure shown at 50% ellipsoidal probability level.

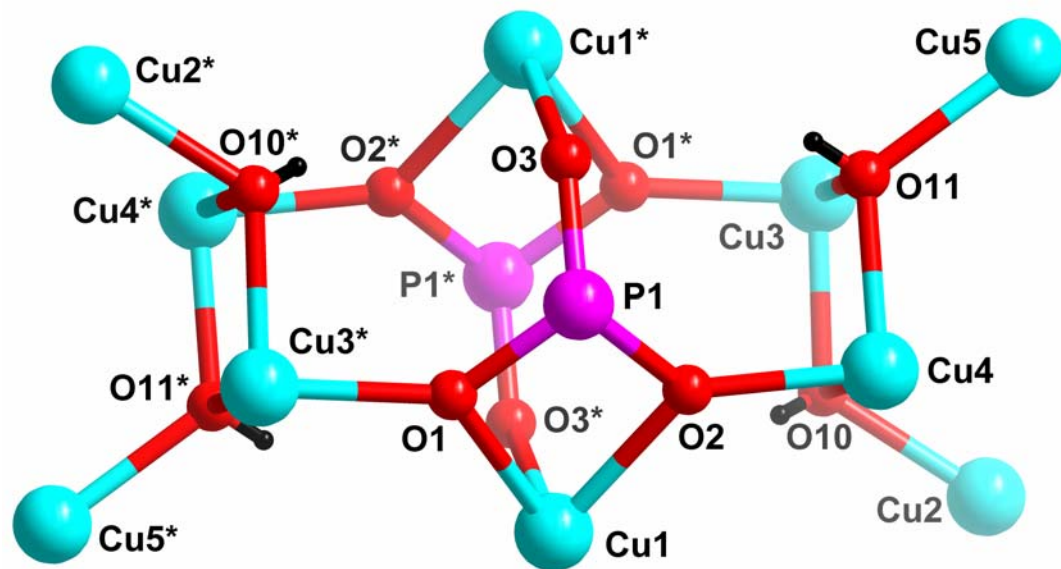

**Figure S2** Core of the *butterfly* cluster **1** (Colour version of the Fig. 2 in the main text).

**Table S1** Selected bond lengths and bond angles for *butterfly* cluster **1**.

| Bond Distances<br>Cu-O and Cu-N (Å) <sup>a</sup> | Bond Distances<br>P-O and N-N (Å) <sup>a</sup> | Bond Angles (°) <sup>a</sup> |                        |
|--------------------------------------------------|------------------------------------------------|------------------------------|------------------------|
| Cu1-O1 2.027(3)                                  | P1-O1 1.560(3)                                 | O9*-Cu1-O1 93.88(14)         | O8-Cu5-N6 97.73(16)    |
| Cu1-O2 2.037(3)                                  | P1-O2 1.564(3)                                 | O4-Cu1-O1 163.20(14)         | O11-Cu5-N6 159.79(17)  |
| Cu1-O3* 2.259(3)                                 | P1-O3 1.490(3)                                 | O1-Cu1-O2 70.97(13)          | N5-Cu5-N6 78.61(17)    |
| Cu1-O4 1.914(3)                                  | P2-O4 1.522(4)                                 | O1-Cu1-O3* 94.48(12)         | N5-Cu5-O51 101.63(16)  |
| Cu1-O9* 1.934(3)                                 | P2-O5 1.556(4)                                 | O4-Cu1-O2 95.99(14)          | N6-Cu5-O51 94.43(16)   |
| Cu2-O5 1.902(4)                                  | P2-O6 1.526(4)                                 | O9*-Cu1-O2 163.52(13)        | O1-P1-O2 98.07(17)     |
| Cu2-O10 1.929(4)                                 | P3-O7 1.523(3)                                 | O2-Cu1-O3* 94.75(12)         | O3-P1-O1 115.30(19)    |
| Cu2-N2 1.894(4)                                  | P3-O8 1.532(3)                                 | O4-Cu1-O9* 97.56(15)         | O3-P1-O2 115.97(13)    |
| Cu2-N3 2.064(5)                                  | P3-O9 1.534(3)                                 | O4-Cu1-O3* 97.19(14)         | O4-P2-O5 110.7(2)      |
| Cu3-O7 1.954(3)                                  | N1-N2 1.335(6)                                 | O9*-Cu1-O3* 92.81(13)        | O4-P2-O6 113.8(2)      |
| Cu3-O10 1.945(4)                                 | N4-N5 1.351(6)                                 | O5-Cu2- N3 99.63(18)         | O6-P2-O5 110.7(2)      |
| Cu3-O11 2.433(4)                                 |                                                | N2-Cu2-O5 177.67(18)         | O7-P3-O8 111.0(2)      |
| Cu3-O1* 1.932(3)                                 |                                                | N2-Cu2- N3 74.84(19)         | O7-P3-O9 112.58(19)    |
| Cu3-N1 1.961(4)                                  |                                                | N2-Cu2-O10 84.31(18)         | O8-P3-O9 109.9(2)      |
| Cu4-O2 1.932(3)                                  |                                                | O5-Cu2- O10 97.18(16)        | P1-O1-Cu1 95.72(16)    |
| Cu4-O6 1.933(3)                                  |                                                | O10-Cu2-N3 163.12(18)        | P1-O1-Cu3* 135.76(19)  |
| Cu4-O11 1.945(4)                                 |                                                | O1*-Cu3-O7 89.20(14)         | P1-O2-Cu1 95.23(16)    |
| Cu4-N4 1.953(4)                                  |                                                | O1*-Cu3-O10 92.49(15)        | P1-O2-Cu4 135.55(19)   |
| Cu5-O8 1.936(3)                                  |                                                | O1*-Cu3-O11 89.41(13)        | P1-O3-Cu1* 134.31(19)  |
| Cu5-O11 1.962(4)                                 |                                                | O1*-Cu3-N1 170.95(16)        | P2-O4-Cu1 134.2(2)     |
| Cu5-O51 2.283(4)                                 |                                                | O10-Cu3-O7 177.15(16)        | P2-O5-Cu2 117.9(2)     |
| Cu5-N5 1.907(4)                                  |                                                | O10-Cu3-N1 87.83(17)         | P2-O6-Cu4 124.1(2)     |
| Cu5-N6 2.074(4)                                  |                                                | O10-Cu3-O11 87.13(15)        | P3-O7-Cu3 120.7(2)     |
|                                                  |                                                | O7-Cu3-N1 90.14(16)          | P3-O8-Cu5 120.8(2)     |
|                                                  |                                                | O7-Cu3-O11 95.18(13)         | P3-O9-Cu1* 133.2(2)    |
|                                                  |                                                | N1-Cu3-O11 99.64(15)         | Cu2-O10-Cu3 122.5(2)   |
|                                                  |                                                | O2-Cu4-O6 89.90(14)          | Cu3*-O1-Cu1 128.43(16) |
|                                                  |                                                | O2-Cu4-O11 93.36(15)         | Cu4-O2-Cu1 129.05(16)  |
|                                                  |                                                | O6-Cu4-O11 175.11(16)        | Cu4-O11-Cu3 95.84(14)  |
|                                                  |                                                | O2-Cu4-N4 169.37(16)         | Cu4-O11-Cu5 122.7(2)   |
|                                                  |                                                | O6-Cu4-N4 89.33(16)          | Cu5-O11-Cu3 95.91(15)  |
|                                                  |                                                | O11-Cu4-N4 88.13(17)         | N1-N2-Cu2 129.8(3)     |
|                                                  |                                                | O8-Cu5-O11 98.25(15)         | N2-N1-Cu3 115.1(3)     |

---

|                       |                    |
|-----------------------|--------------------|
| O8-Cu5-O51 86.93(14)  | N5-N4-Cu4 115.8(3) |
| O11-Cu5-O51 98.69(15) | N4-N5-Cu5 129.5(3) |
| N5-Cu5-O11 83.72(17)  |                    |

<sup>a</sup> For atom labeling scheme, see Figures S1 and S2.

---
